# Supplementary material for: Development and Metabolomic Profiles of Bactrocera dorsalis (Diptera: Tephritidae) Larvae Exposed to Phytosanitary Irradiation Dose in Hypoxic Environment Using DI-SPME-GC/MS
Source: MDPI journal article supplement (doi:10.3390/insects15030177), 2024-03-06
Supplement: s1 [file s1]

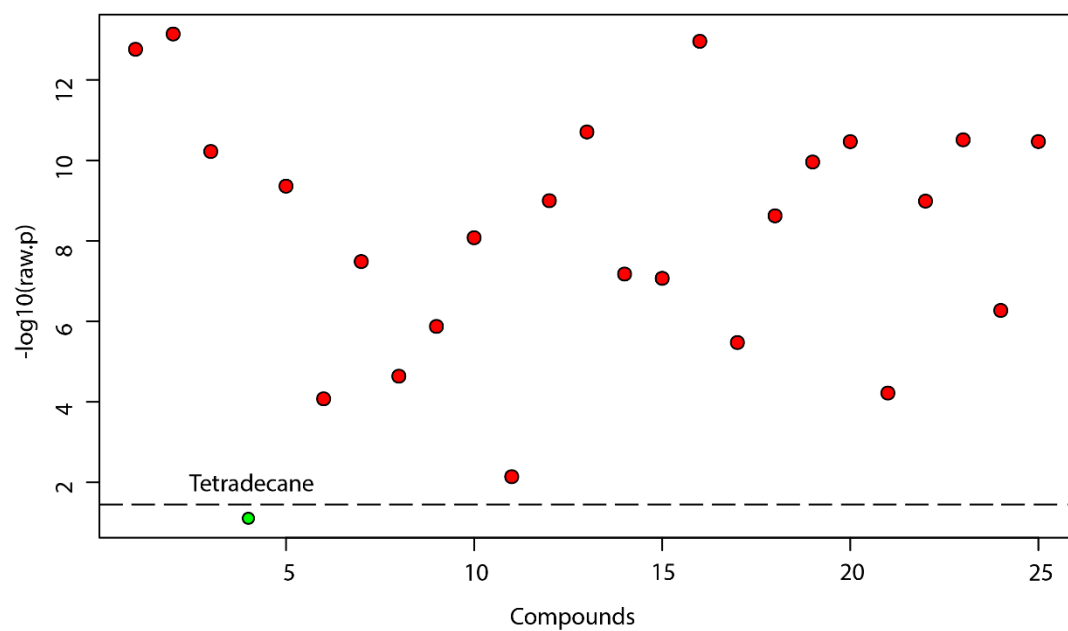

**Figure S1.** Metabolites identified in *B. dorsalis* (Diptera: Tephritidae) larvae exposed to different modified atmospheres under phytosanitary irradiation dose. The ● represented compounds that were selected based on a significant  $P$ -value threshold ( $< 0.05$ ), while the ● indicated non-significant compounds.
